# Supplementary material for: 14-3-3σ downregulation sensitizes pancreatic cancer to carbon ions by suppressing the homologous recombination repair pathway
Source: publisher site journal article supplement (doi:10.18632/aging.205896), 2024-06-05
Supplement: Supplementary file [file aging-v16i11-205896-supplementary-material-SD1.pdf]

**SUPPLEMENTARY FIGURES**

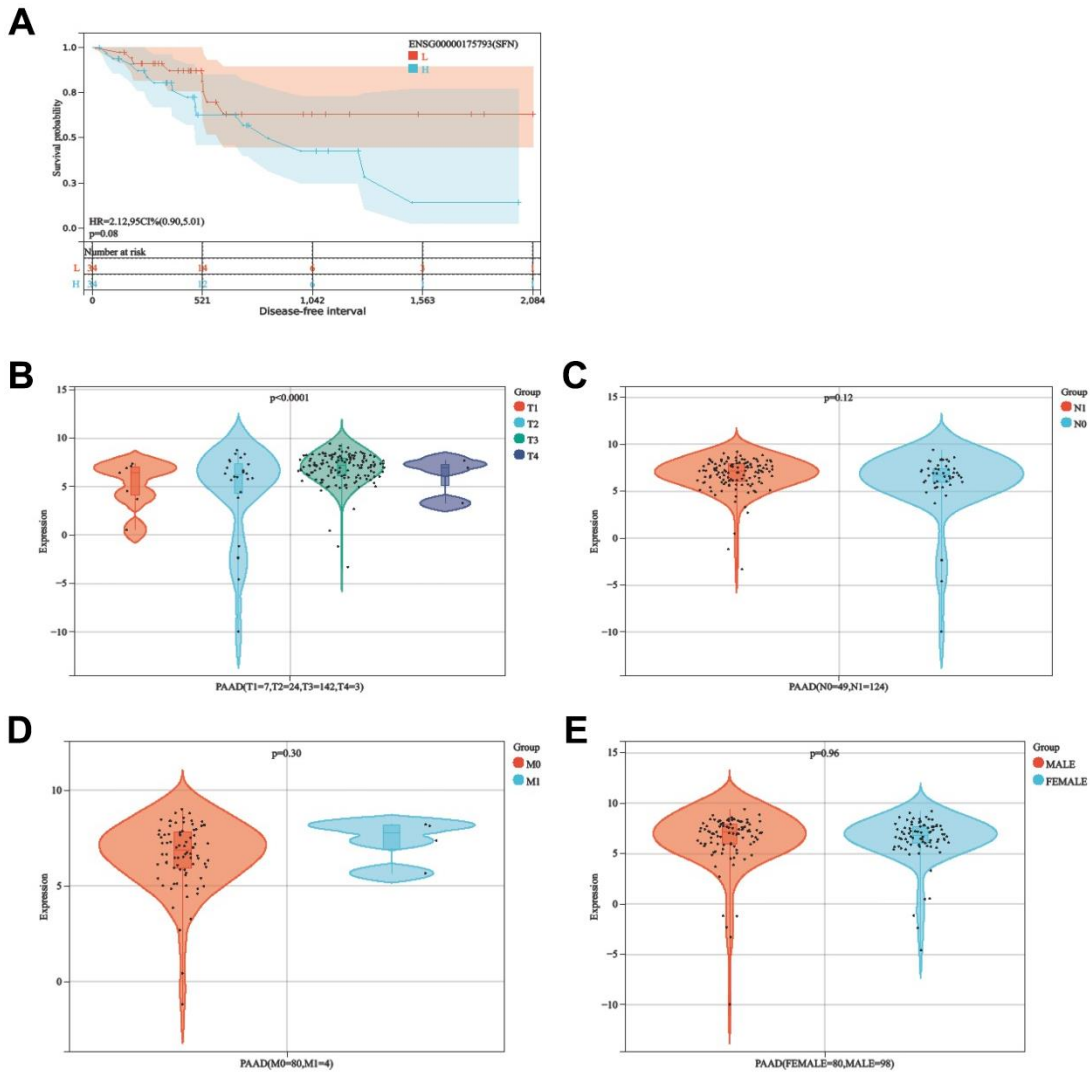

**Supplementary Figure 1.** (A) The K-M survival curves are plotted to predict the DFS of TCGA patients. (B–E) The expression of 14-3-3σ in PAAD tissues in patients with different T (B), N (C), M (D) stages, and sex (E).

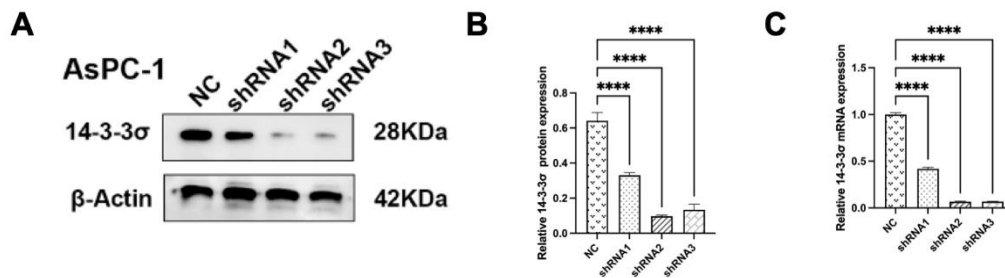

**Supplementary Figure 2.** (A) The protein and mRNA levels of 14-3-3σ in AsPC-1 cells with 14-3-3σ-shRNA were detected by immunoblotting (A, B) and qPCR (C).
