# Supplementary material for: 14-3-3σ downregulation sensitizes pancreatic cancer to carbon ions by suppressing the homologous recombination repair pathway
Source: publisher site journal article supplement (doi:10.18632/aging.205896), 2024-06-05
Supplement: Supplementary file [file aging-v16i11-205896-supplementary-material-SD2.pdf]

## SUPPLEMENTARY TABLES

**Supplementary Table 1. The original data of surviving fraction of AsPC-1 cells.**

| Dose | Carbon ions |       | si14-3-3 $\sigma$ + Carbon ions |       |
|------|-------------|-------|---------------------------------|-------|
|      | Mean        | SD    | Mean                            | SD    |
| 0 Gy | 1.000       | 0.120 | 1.000                           | 0.134 |
| 1 Gy | 0.546       | 0.068 | 0.363                           | 0.086 |
| 2 Gy | 0.170       | 0.031 | 0.072                           | 0.019 |
| 3 Gy | 0.028       | 0.003 | 0.010                           | 0.004 |

Abbreviation: SD, Standard Deviation.

**Supplementary Table 2. The original data of surviving fraction of MiaPaCa-2 cells.**

| Dose | Carbon ions |       | 14-3-3 $\sigma$ + Carbon ions |       |
|------|-------------|-------|-------------------------------|-------|
|      | Mean        | SD    | Mean                          | SD    |
| 0 Gy | 1.000       | 0.053 | 1.000                         | 0.065 |
| 1 Gy | 0.201       | 0.027 | 0.350                         | 0.035 |
| 2 Gy | 0.039       | 0.007 | 0.100                         | 0.016 |
| 3 Gy | 0.008       | 0.001 | 0.021                         | 0.004 |

Abbreviation: SD, Standard Deviation.

**Supplementary Table 3. Sequence information used in this study.**

| <b>ID</b>              | <b>Sequences or target sequence (5'→3')</b>                                                                                                                                                                                                                                                                                                                                                                                                                                                                                                                                                                                                                                                                                                                                                                                       |
|------------------------|-----------------------------------------------------------------------------------------------------------------------------------------------------------------------------------------------------------------------------------------------------------------------------------------------------------------------------------------------------------------------------------------------------------------------------------------------------------------------------------------------------------------------------------------------------------------------------------------------------------------------------------------------------------------------------------------------------------------------------------------------------------------------------------------------------------------------------------|
| 14-3-3σ si 1           | GUCCAGUAUUGAGCAGAAATTUUUCUGCUCAAUACUGGACTT                                                                                                                                                                                                                                                                                                                                                                                                                                                                                                                                                                                                                                                                                                                                                                                        |
| 14-3-3σ si 2           | GGGUCUUCUACCUGAAGAUTTAUCUUCAGGUAGAAGACCCTT                                                                                                                                                                                                                                                                                                                                                                                                                                                                                                                                                                                                                                                                                                                                                                                        |
| 14-3-3σ si 3           | CCAUGGACACAUCAGCAAGAATTUUCUUGCUGAUGUCCAUGGTT                                                                                                                                                                                                                                                                                                                                                                                                                                                                                                                                                                                                                                                                                                                                                                                      |
| Negative control siRNA | UUCUCCGAACGUGUCACGUTTACGUGACACGUCGGAAGAATT                                                                                                                                                                                                                                                                                                                                                                                                                                                                                                                                                                                                                                                                                                                                                                                        |
| 14-3-3σ shRNA          | ACGACAAGAAGCGCATCATTG                                                                                                                                                                                                                                                                                                                                                                                                                                                                                                                                                                                                                                                                                                                                                                                                             |
| Lentivirus NC          | TTCTCCGAACGTGTCACGT                                                                                                                                                                                                                                                                                                                                                                                                                                                                                                                                                                                                                                                                                                                                                                                                               |
| 14-3-3σ OE sequence    | ATGGAGAGAGCCAGTCTGATCCAGAAGGCCAAGCTGGCAGAGCAGGCC<br>GAACGCTATGAGGACATGGCAGCCTTCATGAAAGGCGCCGTGGAGAAG<br>GGCGAGGAGCTCTCCTGCGAAGAGCGAAACCTGCTCTCAGTAGCCTATA<br>AGAACGTGGTGGGCGGCCAGAGGGCTGCCTGGAGGGTGTGTCCAGTA<br>TTGAGCAGAAAAGCAACGAGGAGGGCTCGGAGGAGAAGGGGCCCGAG<br>GTGCGTGAGTACCGGGAGAAGGTGGAGACTGAGCTCCAGGGCGTGTGC<br>GACACCGTGTGGCCTGCTGGACAGCCACCTCATCAAGGAGGCCGGG<br>GACGCCGAGAGCCGGGTCTTCTACCTGAAGATGAAGGGTGACTACTAC<br>CGCTACCTGGCCGAGGTGGCCACCGGTGACGACAAGAAGCGCATCATT<br>GACTCAGCCCAGTACGCTACCAGGAGGCCATGGACATCAGCAAGAAG<br>GAGATGCCGCCACCAACCCCATCCGCTGGGCCTGGCCCTGAACTTTT<br>CCGTCTTCCACTACGAGATCGCCAACAGCCCCGAGGAGGCCATCTCTCT<br>GGCCAAGACCACTTTCGACGAGGCCATGGCTGATCTGCACACCCTCAGC<br>GAGGACTCCTACAAAGACAGCACCCCTCATCATGCAGCTGCTGCGAGAC<br>AACCTGACACTGTGGACGGCCGACAACGCCGGGGAAGAGGGGGCGA<br>GGCTCCCCAGGAGCCCCAGAGCTGA |

**Supplementary Table 4. Antibodies used in this study.**

| <b>Antibodies</b> | <b>Application</b> | <b>Company</b>            | <b>Catalog numbers</b> |
|-------------------|--------------------|---------------------------|------------------------|
| 14-3-3σ           | 1:5000 for WB      | Proteintech               | 66251-1-Ig             |
| p-CHK1            | 1:2000 for WB      | Immunoway                 | YP0063                 |
| CHK1              | 1:2000 for WB      | Immunoway                 | YT0902                 |
| RPA2              | 1:2000 for WB      | Immunoway                 | YT4170                 |
| RPA2              | 1:200 for IHC      | Immunoway                 | YT4170                 |
| RPA2              | 1:2000 for IF      | Proteintech               | 67999-1-Ig             |
| p-RPA2            | 1:2000 for WB      | Immunoway                 | YP0476                 |
| p-CHK2            | 1:2000 for WB      | Immunoway                 | YP0065                 |
| CHK2              | 1:2000 for WB      | Immunoway                 | YT0908                 |
| p-ATM             | 1:2000 for WB      | Immunoway                 | YP1206                 |
| ATM               | 1:2000 for WB      | Immunoway                 | YT0397                 |
| p-ATR             | 1:2000 for WB      | Immunoway                 | YP1269                 |
| ATR               | 1:2000 for WB      | Immunoway                 | YT0416                 |
| γ H2AX            | 1:2000 for WB      | Cell Signaling Technology | 9718                   |
| γ H2AX            | 1:200 for IF       | Cell Signaling Technology | 9718                   |
| γ H2AX            | 1:200 for IHC      | Cell Signaling Technology | 9718                   |
| RAD51             | 1:3000 for WB      | GeneTex                   | GTX100469              |
| RAD51             | 1:200 for IF       | GeneTex                   | GTX100469              |
| 53BP1             | 1:3000 for WB      | GeneTex                   | GTX102595              |
| 53BP1             | 1:200 for IF       | GeneTex                   | GTX102595              |
| Ki67              | 1:400 for IHC      | Proteintech               | 28074-1-AP             |
| β-Actin           | 1:2000 for WB      | Proteintech               | 66009-1-Ig             |

**Supplementary Table 5. Primer sequences used for amplification**

| <b>Gene</b>        | <b>Sequences or target sequence (5'→3')</b> |
|--------------------|---------------------------------------------|
| 14-3-3 $\sigma$ Fp | GGATCCCACTCTTCTTGCA                         |
| 14-3-3 $\sigma$ Rp | CTGTCCAGTTCTCAGCCACA                        |
| $\beta$ -actin Fp  | CGGAACCGCTCATTGCC                           |
| $\beta$ -actin Rp  | ACCCACACTGTGCCCATCTA                        |
| ATM Fp             | TGCACTTCCGTCAGCAAAGA                        |
| ATM Rp             | GCGCTTACACATCTCTCCAC                        |
| ATR Fp             | CGTGATCAGCGAGAGCCTTT                        |
| ATR Rp             | ACATGGGTCTTGGCCTTTTCA                       |
